# Supplementary material for: Hollow silica bubble based immobilized trypsin for highly efficient proteome digestion and buoyant separation
Source: Royal Society of Chemistry journal article supplement (doi:10.1039/c6ra12599a), 2016-01-01
Supplement: c6ra12599a1.pdf [file c6ra12599a1.pdf]

**Electronic Supplementary Information  
for**

**A hollow silica bubble based immobilized trypsin for high  
efficient proteome digestion and buoyant separation**

Fenglong Jiao,<sup>ab</sup> Rui Zhai,<sup>b</sup> Junjie Huang,<sup>b</sup> Yukui Zhang,<sup>c</sup> Yangjun Zhang,<sup>\*b</sup>

Xiaohong Qian,<sup>\*b</sup>

a School of Life Science and Technology, Beijing Institute of Technology, Beijing  
100081, China

b State Key Laboratory of Proteomics, National Center for Protein Science Beijing,  
Beijing Institute of Radiation Medicine, Beijing 102206, China

c National Chromatographic Research and Analysis Center, Dalian Institute of  
Chemical Physics, Chinese Academy of Sciences, Dalian 116011, China

\*Corresponding Author:

Yangjun Zhang

State Key Laboratory of Proteomics

National Center for Protein Science Beijing,

Beijing Institute of Radiation Medicine,

Beijing 102200, China

Email: 13683167093@163.com

Phone: +86-010-61777110

XiaohongQian

State Key Laboratory of Proteomics

National Center for Protein Science Beijing,

Beijing Institute of Radiation Medicine,

Beijing 102200, China

Email: 13911734119@163.com

Phone: +86-010-61777109

## Measurement of the trypsin loading amount on GMA@SiB

To determine the loading amount of trypsin on GMA@SiB, a series of trypsin solution with different concentrations were prepared and utilized to make a calibration curve by measuring the UV absorption value at 280 nm. Then, trypsin solution (PBS pH 7.4) with an initial concentration of 4mg/mL was mixed with GMA@SiB for trypsin immobilization overnight at 4°C. After immobilization, the trypsin@SiB were collected and the UV value of solution at 280 nm was measured to calculate the amount of trypsin loaded on the GMA@SiB particles.

Figure S1

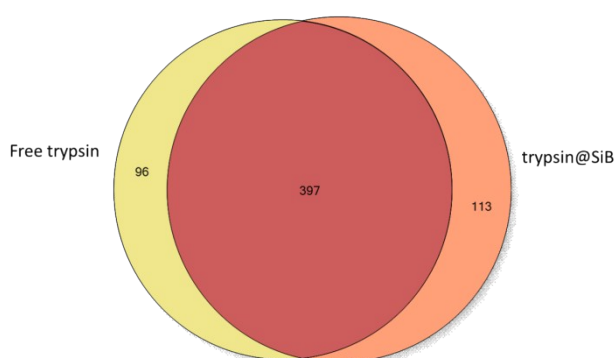

Fig. S1 Protein groups identified by trypsin@SiB and free trypsin

Figure S2

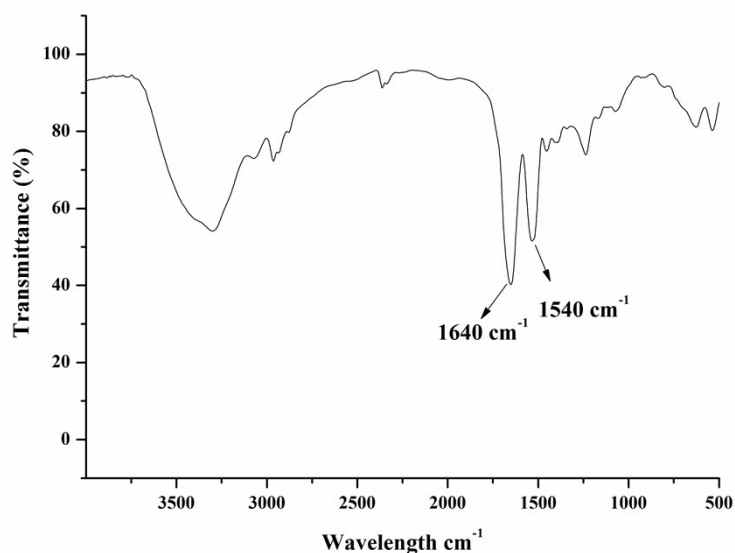

Fig. S2 FT-IR spectra of trypsin

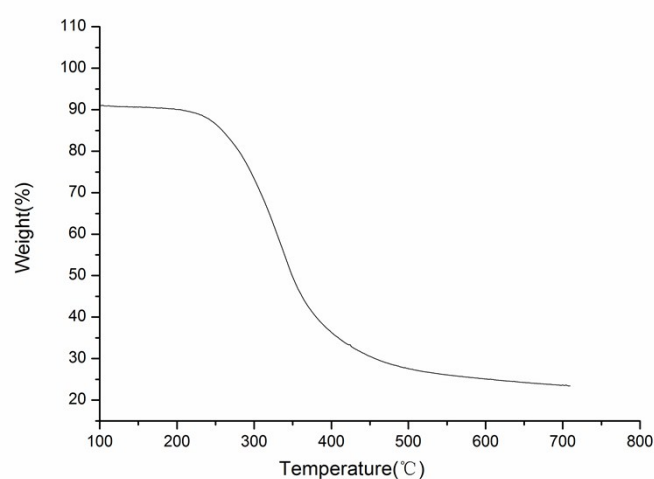

Fig. S3 TGA curves of pristine trypsin

Table S1 Amino acid sequence coverage of BSA obtained from (a) trypsin@SiB for 1min digestion and (b) free trypsin for 12h digestion. Matched amino acids in the identified peptides (allowing 2 miss cleavages) are shown in red

(a)

**1** MKWVTFISLL LLFSSAYSRG VFRRDTHKSE IAHRFKDLGE EHFKGLVLIA  
**51** FSQYLQQCPF DEHVKLVNEL TEFKTCVAD ESHAGCEKSL HTLFGDELCK  
**101** VASLRETYGD MADCCEKQEP ERNECFLSHK DDSPDLPKLK PDPNTLCDEF  
**151** KADEKKFWGK YLYEIARRHP YFYAPELLYY ANKYNGVFQE CCQAEDKGAC  
**201** LLPKIETMRE KVLTSARQR LRCASIQKFG ERALKAWSVA RLSQKFPKAE  
**251** FVEVTKLVTD LTKVHKECCH GDLLECADDR ADLAKYICDN QDTISSKLKE  
**301** CCDKPLLEKS HCIAEVEKDA IPENLPPLTA DFAEDKDVCK NYQEAKDAFL  
**351** GSFLYEYSRR HPEYAVSVLL RLAKEYEATL EECCAADDPH ACYSTVFDKL  
**401** KHLVDEPQNL IKQNCDFEK LGEYGFQNAL IVRYTRKVPQ VSTPTLVEVS  
**451** RSLGKVGTRC CTKPESERMP CTEDYLSLIL NRLCVLHEKT PVSEKVTKCC  
**501** TESLVNRRPC FSALTPDETY VPKAFDEKLF TFHADICTLP DTEKQIKKQT  
**551** ALVELLKHKP KATEEQLKTV MENFVAFVDK CCAADDKEAC FAVEGPKLVV  
**601** STQTALA

(b)

**1** MKWVTFISLL LLFSSAYSRG VFRRDTHKSE IAHRFKDLGE EHFKGLVLIA  
**51** FSQYLQQCPF DEHVKLVNEL TEFKTCVAD ESHAGCEKSL HTLFGDELCK  
**101** VASLRETYGD MADCCEKQEP ERNECFLSHK DDSPDLPKLK PDPNTLCDEF  
**151** KADEKKFWGK YLYEIARRHP YFYAPELLYY ANKYNGVFQE CCQAEDKGAC  
**201** LLPKIETMRE KVLTSARQR LRCASIQKFG ERALKAWSVA RLSQKFPKAE  
**251** FVEVTKLVTD LTKVHKECCH GDLLECADDR ADLAKYICDN QDTISSKLKE  
**301** CCDKPLLEKS HCIAEVEKDA IPENLPPLTA DFAEDKDVCK NYQEAKDAFL  
**351** GSFLYEYSRR HPEYAVSVLL RLAKEYEATL EECCAADDPH ACYSTVFDKL  
**401** KHLVDEPQNL IKQNCDFEK LGEYGFQNAL IVRYTRKVPQ VSTPTLVEVS

451 RSLGKVGTRC CTKPESERMP CTEDYLSLIL NRLCVLHEKT PVSEKVTKCC  
 501 TESLVNRRPC FSALTPDETY VPKAFDEKLF TFHADICTLP DTEKQIKKQT  
 551 ALVELLKHKP KATEEQLKTV MENFVAFVVK CCAADDKEAC FAVEGPKLVV  
 601 STQTALA

Table S2 Detailed information of the observed peptides in BSA tryptic digest by free trypsin and trypsin@SiB

| Peptide sequence (BSA)    | m/z       | free<br>trypsin | trypsin@SiB |
|---------------------------|-----------|-----------------|-------------|
| -.MKWVTFISLLLLFSSAYS.R.G  | 2277.0901 | N               | Y           |
| R.DTHKSEIAHR.F            | 1192.6269 | Y               | Y           |
| R.DTHKSEIAHRFK.D          | 1467.6757 | Y               | N           |
| R.FKDLGEEHFK.G            | 1248.6415 | Y               | Y           |
| K.DLGEEHFK.G              | 973.4676  | Y               | Y           |
| K.LVNELTEFAK.T            | 1162.6438 | Y               | Y           |
| K.TCVADESHAGCEK.S         | 1462.6224 | Y               | Y           |
| K.SLHTLFGDELCK.V          | 1418.7123 | Y               | Y           |
| K.VASLRETYGDMADCCEK.Q     | 2019.8857 | Y               | N           |
| R.ETYGDMADCCEK.Q          | 1477.5665 | Y               | Y           |
| K.QEPERNECFLSHK.D         | 1672.7962 | Y               | Y           |
| K.QEPERNECFLSHKDDSPDLPK.L | 2540.1299 | Y               | Y           |
| R.NECFLSHK.D              | 1033.5088 | Y               | Y           |
| R.NECFLSHKDDSPDLPK.L      | 1900.8647 | Y               | Y           |
| K.DDSPDLPK.L              | 885.4123  | Y               | Y           |
| K.LKPDNTLCDEFK.A          | 1575.7873 | Y               | Y           |
| K.LKPDNTLCDEFKADEK.K      | 2018.9770 | Y               | Y           |
| K.LKPDNTLCDEFKADEKK.F     | 2147.0811 | N               | Y           |
| K.ADEKKFWGK.Y             | 1107.5250 | N               | Y           |
| K.FWGKYLVEIARR.H          | 1600.7553 | N               | Y           |
| K.YLVEIAR.R               | 926.5005  | Y               | Y           |
| R.RHPYFYAPPELLYYANK.Y     | 2044.0610 | Y               | N           |
| R.HPYFYAPPELLYYANK.Y      | 1887.8986 | N               | Y           |
| K.YNGVFQECQAEDK.G         | 1746.7334 | Y               | Y           |
| K.GACLLPKIETMR.E          | 1403.6637 | Y               | Y           |
| K.GACLLPKIETMREK.V        | 1660.9488 | N               | Y           |
| K.IETMREK.V               | 905.4736  | N               | Y           |
| K.IETMREKVLTSAR.Q         | 1619.9804 | N               | Y           |
| R.EKVLTSAR.Q              | 989.5807  | Y               | Y           |
| K.VLTSARQR.L              | 1016.5914 | N               | Y           |
| K.VLTSARQRLR.C            | 1285.6448 | N               | Y           |
| R.CASIQKFGER.A            | 1194.5723 | Y               | Y           |
| R.ALKAWSVARLSQK.F         | 1456.7145 | N               | Y           |
| R.LSQKFPK.A               | 846.4971  | N               | Y           |

|                                    |           |   |   |
|------------------------------------|-----------|---|---|
| K.AEFVEVTK.L                       | 921.4849  | Y | Y |
| K.LVTDLTKVHK.E                     | 1152.5881 | N | Y |
| K.LVTDLTKVHKECCHGDLLECADDR.A       | 2883.4988 | N | Y |
| K.VHKECCHGDLLECADDR.A              | 2112.8990 | N | Y |
| K.VHKECCHGDLLECADDRADLAK.Y         | 2611.1578 | N | Y |
| K.ECCHGDLLECADDR.A                 | 1748.7048 | Y | Y |
| K.ECCHGDLLECADDRADLAK.Y            | 2246.9512 | Y | Y |
| K.YICDNQDTISSK.L                   | 1442.6716 | Y | Y |
| K.LKECCDKPLLEK.S                   | 1531.7986 | Y | Y |
| K.ECCDKPLLEK.S                     | 1290.6241 | Y | Y |
| K.SHCIAEVEK.D                      | 1071.5313 | Y | Y |
| K.SHCIAEVEKDAIPENLPPLTADFAEDK.D    | 3008.5062 | N | Y |
| K.SHCIAEVEKDAIPENLPPLTADFAEDKDVCK. | 3510.5774 | N | Y |
| N                                  |           |   |   |
| K.DAIPENLPPLTADFAEDK.D             | 1954.8334 | N | Y |
| K.DAIPENLPPLTADFAEDKDVCK.N         | 2457.1202 | N | Y |
| K.DAIPENLPPLTADFAEDKDVCKNYQEAK.D   | 3190.4048 | N | Y |
| K.DAFLGSFLYEYSRR.H                 | 1722.8423 | N | Y |
| R.RHPEYAVSVLLR.L                   | 1438.8492 | Y | Y |
| R.HPEYAVSVLLR.L                    | 1282.7214 | Y | Y |
| R.HPEYAVSVLLRLAK.E                 | 1594.8230 | Y | Y |
| K.EYEATLEECCA.K.D                  | 1501.6407 | Y | Y |
| K.DDPHACYSTVFDK.L                  | 1553.7724 | Y | Y |
| K.HLVDEPQNLIK.Q                    | 1304.7403 | Y | Y |
| K.QNCDQFEK.L                       | 1067.4657 | Y | Y |
| K.LGEYGFQNALIVR.Y                  | 1478.8200 | Y | Y |
| K.LGEYGFQNALIVRYTRK.V              | 2027.2441 | N | Y |
| R.KVPQVSTPTLVEVSR.S                | 1638.9762 | Y | Y |
| K.VPQVSTPTLVEVSRSLGK.V             | 1895.9649 | Y | N |
| K.VPQVSTPTLVEVSR.S                 | 1510.8538 | N | Y |
| R.SLGKVGTRCCTKPESER.M              | 1963.9523 | Y | Y |
| R.CCTKPESER.M                      | 1165.5204 | Y | Y |
| R.MPCTEDYLSLILNR.L                 | 1723.9057 | Y | Y |
| R.MPCTEDYLSLILNRLCVLHEKTPVSEK.V    | 3244.5970 | N | Y |
| R.LCVLHEK.T                        | 897.4778  | Y | Y |
| K.CCTESLVNR.R                      | 1137.5247 | Y | Y |
| R.RPCFSALTPDETYVPK.A               | 1879.9523 | Y | Y |
| K.LFTFHADICTLPDTEK.Q               | 1906.9447 | Y | Y |
| K.QIKKQTALVELLK.H                  | 1510.8981 | Y | N |
| K.KQTALVELLK.H                     | 1141.7372 | Y | Y |
| K.QTALVELLK.H                      | 1013.6217 | Y | Y |
| K.ATEEQLK.T                        | 817.4267  | Y | Y |
| K.TVMENFVAFVDK.C                   | 1398.6965 | Y | Y |
| K.CCAADDKEACFAVEGPK.L              | 1926.8371 | Y | Y |

|                       |                  |          |          |
|-----------------------|------------------|----------|----------|
| <b>K.EACFAVEGPK.L</b> | <b>1106.5430</b> | <b>Y</b> | <b>Y</b> |
| <b>K.LVVSTQTALA.-</b> | <b>1001.5842</b> | <b>Y</b> | <b>Y</b> |

Table S3 Elemental analysis of SiB, GMA@SiB and trypsin@SiB

|             | N[%] | C[%]  | H[%]  | S[%]  |
|-------------|------|-------|-------|-------|
| SiB         | 0.06 | 0     | 0.336 | 0.258 |
| GMA@SiB     | 0.08 | 10.08 | 1.316 | 0.188 |
| trypsin@SiB | 1.96 | 5.66  | 1.896 | 0.065 |
